# Supplementary material for: Skin Commensal Staphylococci May Act as Reservoir for Fusidic Acid Resistance Genes
Source: PubMed Central journal article supplement (PMC4651549; doi:10.1371/journal.pone.0143106), 2015-11-18

# S1 FIG.

A (RI integrated into *groEL* in *S. epidermidis*)

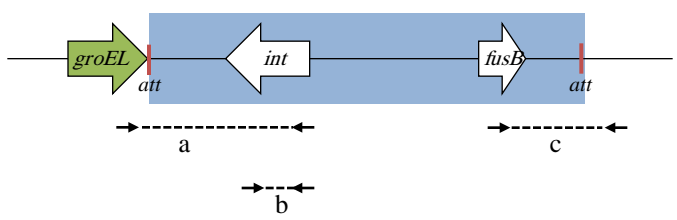

B (RI integrated into *smpB* in *S. epidermidis*)

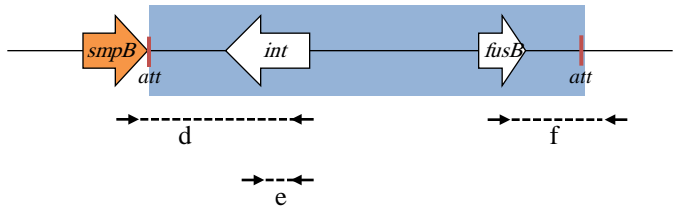

C (RI integrated into *rpsR* in *S. epidermidis*)

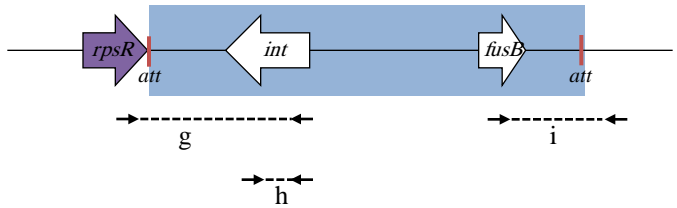

D (RI integrated into *groEL* in *S. capitis* subsp. *urealyticus*)

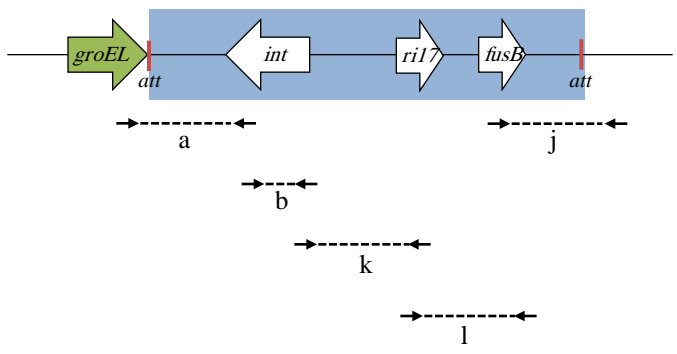

E (Plasmid)

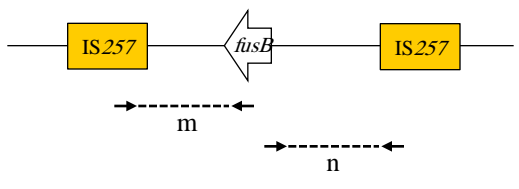

Supplement: pone.0143106.s001.pdf [file pone.0143106.s001.pdf]
