# Supplementary material for: Skin Commensal Staphylococci May Act as Reservoir for Fusidic Acid Resistance Genes
Source: PubMed Central journal article supplement (PMC4651549; doi:10.1371/journal.pone.0143106), 2015-11-18

# S2 FIG.

A (SCC*fusC*)

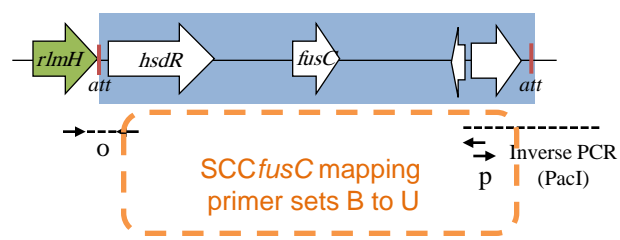

B (Pseudo SCC and the 17.8-kb fragment)

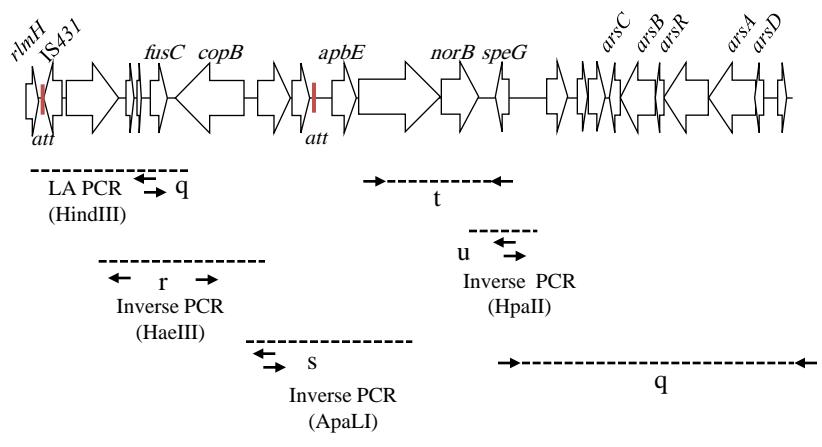

Supplement: pone.0143106.s002.pdf [file pone.0143106.s002.pdf]
